# Supplementary material for: Association of Fried Food Intake with Gastric Cancer Risk: A Systemic Review and Meta-Analysis of Case–Control Studies
Source: MDPI journal article supplement (doi:10.3390/nu15132982), 2023-06-30

Supplementary Figure S1. Forest plot of the association between high fried food intake and gastric cancer risk according to publication date.

A. Total participants according to before and after 2015

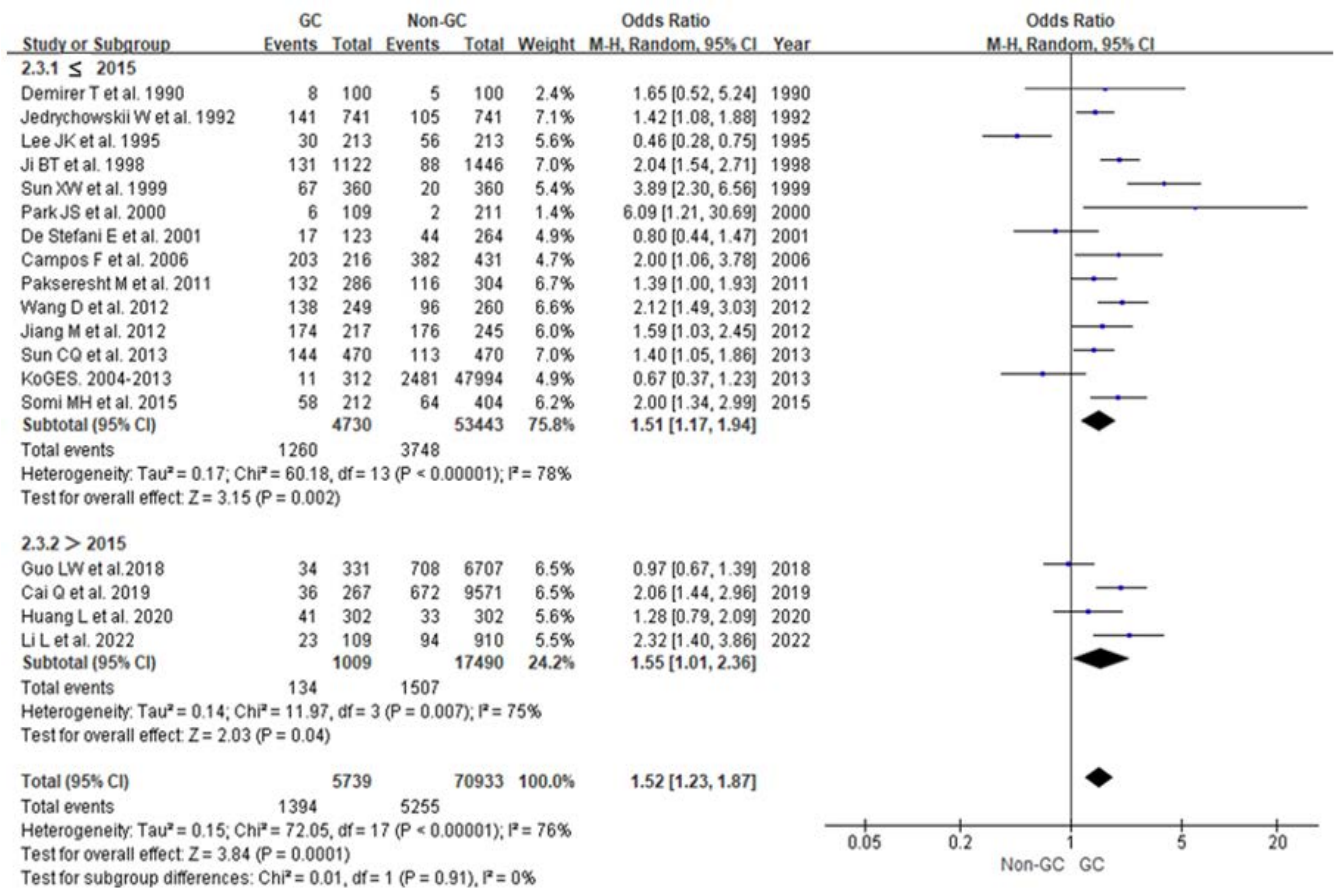

## B. East Asians according to before and after 2015

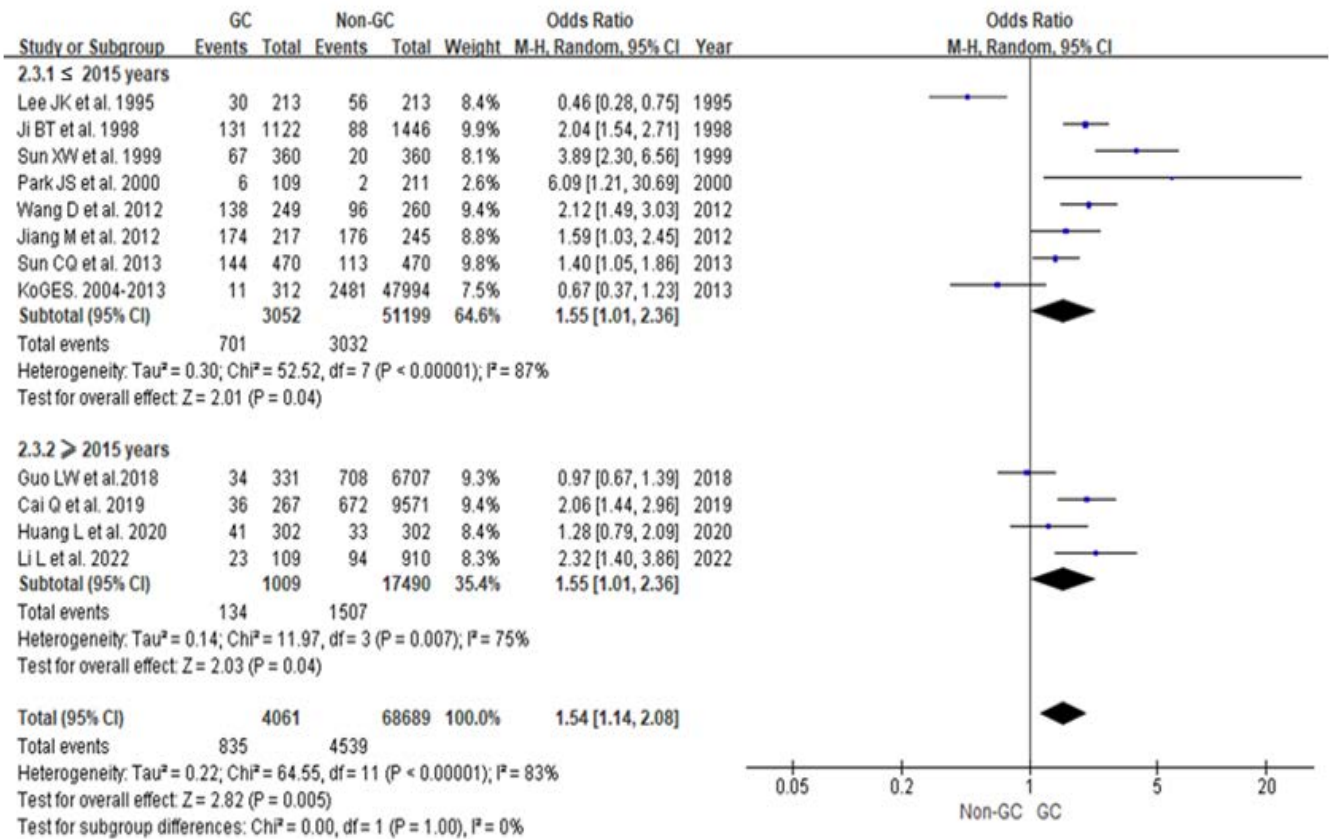

Supplement: s1 [file s1]
