# Supplementary material for: Association of Fried Food Intake with Gastric Cancer Risk: A Systemic Review and Meta-Analysis of Case–Control Studies
Source: MDPI journal article supplement (doi:10.3390/nu15132982), 2023-06-30
Supplement: s1 [file s1]

**Supplementary Table S1: Quality assessment of case-control studies (n = 18)**

| First author,<br>(Year),<br>Country<br>Ref. no | Research<br>question | Study<br>population | Target<br>population<br>and case<br>representation | Sample size<br>justification | Groups<br>recruited<br>from the<br>same<br>population | Inclusion and<br>exclusion<br>criteria<br>prespecified<br>and applied<br>uniformly | Case and<br>control<br>definitions | Random<br>selection of<br>study<br>participants | Concurrent<br>controls | Exposure<br>assessed prior<br>to outcome<br>measurement | Exposure<br>measures<br>and<br>assessment | Blinding<br>of<br>exposure<br>assessors | Statistical<br>analysis | Total<br>score |
|------------------------------------------------|----------------------|---------------------|----------------------------------------------------|------------------------------|-------------------------------------------------------|------------------------------------------------------------------------------------|------------------------------------|-------------------------------------------------|------------------------|---------------------------------------------------------|-------------------------------------------|-----------------------------------------|-------------------------|----------------|
| Demirer et al.<br>(1990)<br>Turkey [17]        | 0                    | 0                   | 0                                                  | 2                            | 0                                                     | 2                                                                                  | 0                                  | 1                                               | 2                      | 0                                                       | 1                                         | 2                                       | 2                       | 10             |
| Jedrychowski<br>et al. (1992)<br>Poland [18]   | 0                    | 0                   | 0                                                  | 2                            | 0                                                     | 2                                                                                  | 0                                  | 1                                               | 2                      | 1                                                       | 1                                         | 2                                       | 0                       | 10             |
| Lee et al.<br>(1995)<br>Korea [11]             | 0                    | 0                   | 0                                                  | 0                            | 0                                                     | 0                                                                                  | 0                                  | 1                                               | 2                      | 0                                                       | 1                                         | 2                                       | 0                       | 10             |
| Ji et al.<br>(1998)<br>China [19]              | 0                    | 0                   | 0                                                  | 0                            | 0                                                     | 2                                                                                  | 0                                  | 0                                               | 2                      | 0                                                       | 1                                         | 2                                       | 0                       | 10             |
| Sun et al.<br>(1999)<br>China [20]             | 0                    | 0                   | 0                                                  | 0                            | 2                                                     | 2                                                                                  | 0                                  | 0                                               | 1                      | 2                                                       | 1                                         | 2                                       | 0                       | 10             |
| Park et al.<br>(2000)<br>Korea [14]            | 0                    | 0                   | 0                                                  | 2                            | 0                                                     | 2                                                                                  | 0                                  | 1                                               | 2                      | 1                                                       | 1                                         | 2                                       | 2                       | 10             |
| De Stefani et<br>al.<br>(2001)<br>Uruguay [23] | 0                    | 0                   | 0                                                  | 0                            | 0                                                     | 2                                                                                  | 0                                  | 1                                               | 2                      | 0                                                       | 1                                         | 2                                       | 0                       | 10             |
| KoGES<br>2004-2013<br>Korea [28]               | 0                    | 0                   | 0                                                  | 2                            | 0                                                     | 0                                                                                  | 0                                  | 1                                               | 2                      | 0                                                       | 1                                         | 0                                       | 0                       | 10             |
| Campos et al.<br>(2006)<br>Colombia [12]       | 0                    | 0                   | 0                                                  | 0                            | 0                                                     | 0                                                                                  | 0                                  | 1                                               | 1                      | 1                                                       | 1                                         | 1                                       | 2                       | 10             |
| Pakseresht et<br>al.                           | 0                    | 0                   | 0                                                  | 2                            | 2                                                     | 2                                                                                  | 0                                  | 0                                               | 1                      | 0                                                       | 1                                         | 2                                       | 0                       | 10             |

|                                      |   |   |   |   |   |   |   |   |   |   |   |   |   |
|--------------------------------------|---|---|---|---|---|---|---|---|---|---|---|---|---|
| (2011)<br>Iran [26]                  |   |   |   |   |   |   |   |   |   |   |   |   |   |
| Wang et al.<br>(2012)<br>China [16]  | 0 | 0 | 0 | 2 | 0 | 0 | 0 | 1 | 1 | 0 | 1 | 2 | 0 |
| Jiang et al.<br>(2012)<br>China [22] | 0 | 0 | 0 | 0 | 2 | 2 | 0 | 1 | 1 | 1 | 2 | 2 | 1 |
| Sun et al.<br>(2013)<br>China [15]   | 0 | 0 | 0 | 2 | 0 | 0 | 0 | 0 | 0 | 0 | 1 | 2 | 2 |
| Somi et al.<br>(2015)<br>Iran [27]   | 0 | 0 | 0 | 2 | 0 | 0 | 0 | 1 | 1 | 0 | 1 | 2 | 0 |
| Guo et al.<br>(2018)<br>China [21]   | 0 | 0 | 0 | 0 | 0 | 0 | 0 | 1 | 2 | 1 | 1 | 1 | 0 |
| Cai Q et al.<br>(2019)<br>China [13] | 0 | 0 | 0 | 0 | 0 | 0 | 0 | 1 | 0 | 0 | 1 | 0 | 0 |
| Huang et al.<br>(2020)<br>China [24] | 0 | 0 | 0 | 2 | 0 | 0 | 0 | 1 | 1 | 2 | 1 | 1 | 0 |
| Li et al.<br>(2022)<br>China [25]    | 0 | 0 | 0 | 0 | 0 | 0 | 0 | 1 | 0 | 0 | 1 | 1 | 0 |

---

Note: 0, yes; 1, not applicable or not reported; 2, no.
